# Supplementary material
Source: publisher figshare collection journal article supplement (https://acs.figshare.com/ndownloader/files/13879751)
Supplement: Supplementary file 1 [file 13879751]

## SUPPORTING INFORMATION

# Monitoring Drug Crystallization in Percutaneous Penetration Using Localized Nanothermal Analysis and Photothermal Microspectroscopy

Choon Fu Goh,<sup>\*,†,‡</sup> Jonathan G. Moffat,<sup>§</sup> Duncan Q. M. Craig,<sup>†</sup> Jonathan Hadgraft,<sup>†</sup> and Majella E. Lane<sup>†</sup>

<sup>†</sup>Department of Pharmaceutics, UCL School of Pharmacy, 29-39 Brunswick Square, London WC1N 1AX, United Kingdom

<sup>‡</sup>Discipline of Pharmaceutical Technology, School of Pharmaceutical Sciences, Universiti Sains Malaysia, 11800 Minden, Penang, Malaysia

<sup>§</sup>Asylum Research, Oxford Instruments Company, Halifax Road, HP12 3SE High Wycombe, United Kingdom

### \* Corresponding author:

Choon Fu Goh

Discipline of Pharmaceutical Technology, School of Pharmaceutical Sciences, Universiti Sains Malaysia, 11800 Minden, Penang, Malaysia

Phone: +604-6532074. Fax: +604-6570017. Email: [gohchoonfu@hotmail.com](mailto:gohchoonfu@hotmail.com) / [choonfugoh@usm.my](mailto:choonfugoh@usm.my)

**Figure S1 and S2 show the proposed mechanisms of the creation of the green domain and double transitions in TTM measurements.**

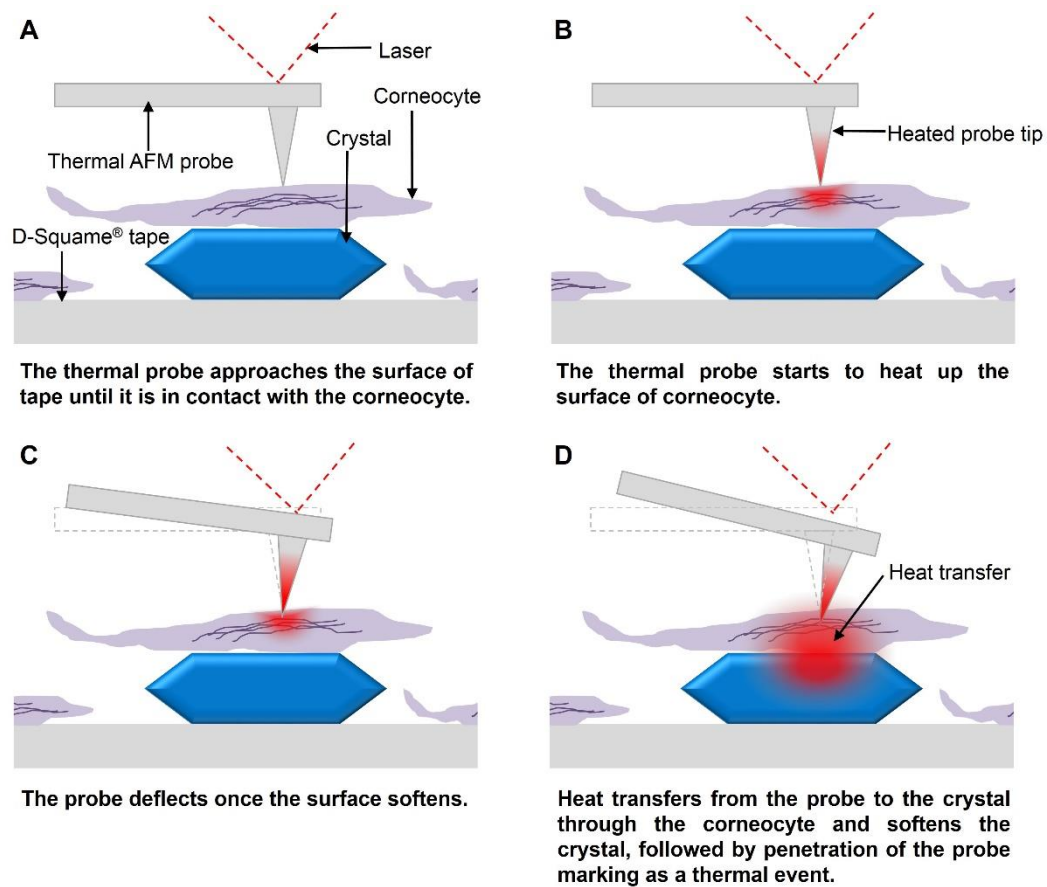

**Figure S1 The proposed mechanism of the creation of the green domain in the TTM image scanning over a tape with PSC and crystals**

**A**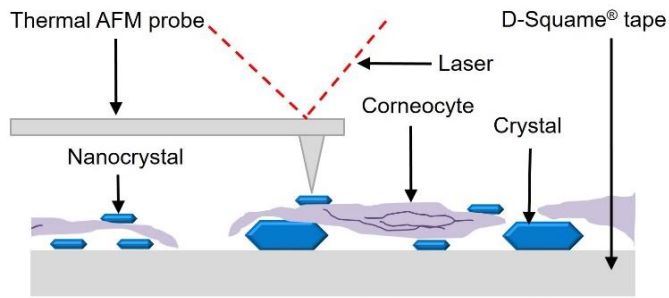

The thermal probe engages with the surface of the tape and is in contact with the nanocrystals on the corneocytes.

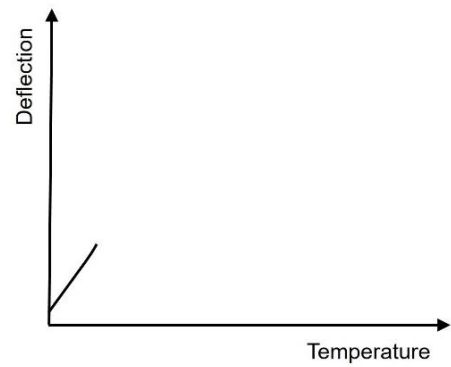**B**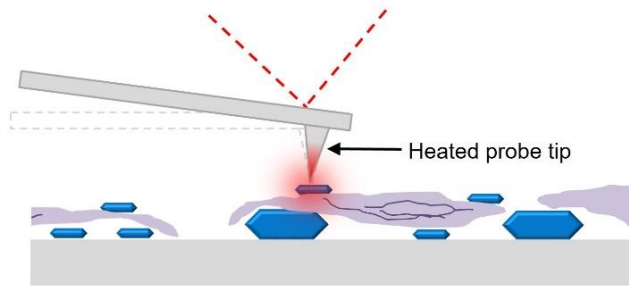

The probe deflects once the nanocrystals melt and generates a transition (blue domain).

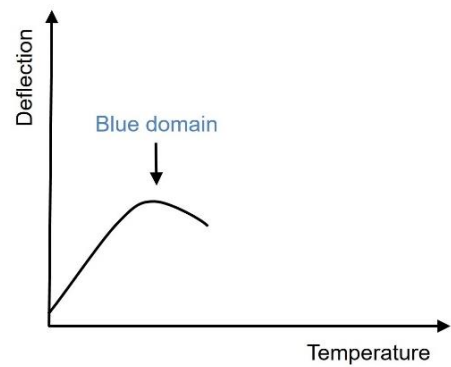**C**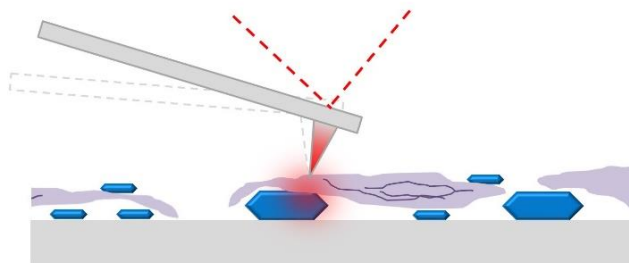

Before reaching the retraction limit, the probe continues to deflect and heats the corneocytes beneath the melted nanocrystals, resulting in the formation of a second transition (green domain).

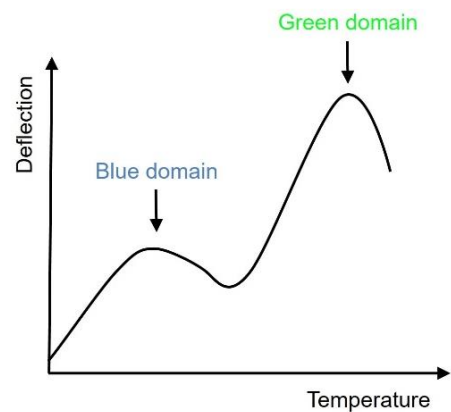

**Figure S2 Schematic diagrams of the formation of double transitions in the TTM image**

**Figure S3 and S4 show the PTMS measurements for untreated PSC, PSC treated with PG and IBU crystals.**

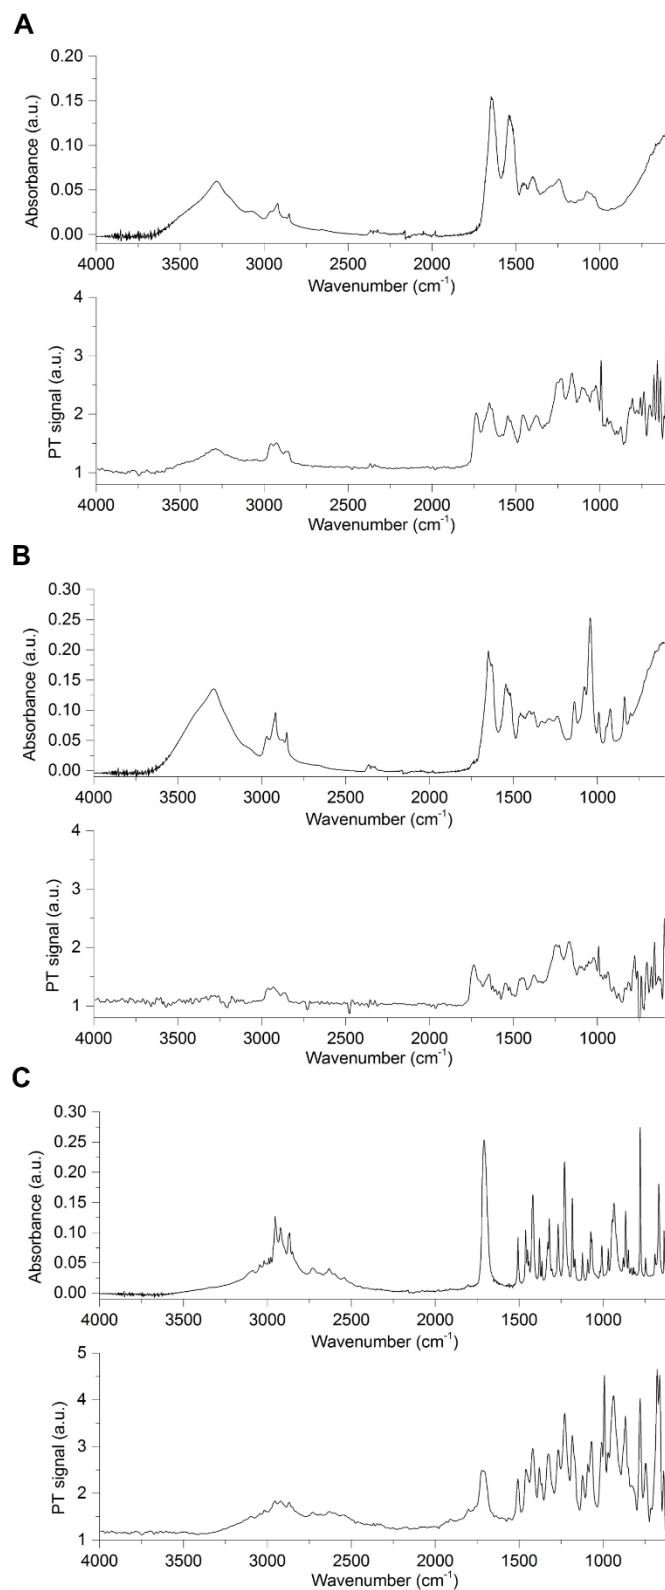

**Figure S3 ATR-FTIR spectra (upper panel) and photothermal FTIR (lower panel) spectra for (A) untreated PSC, (B) PSC treated with PG and (C) IBU crystals**

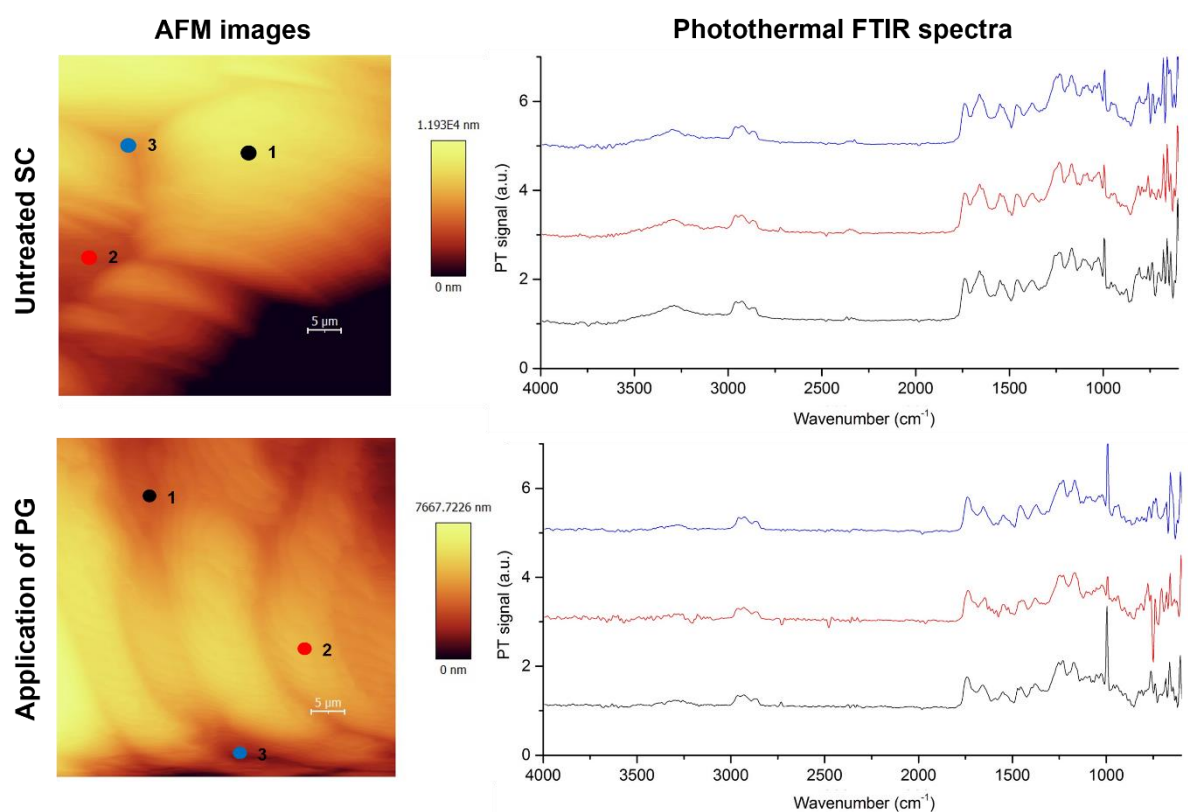

**Figure S4 AFM images and corresponding photothermal FTIR spectra of PSC (with and without application of PG) on the first tape strip**
